# Supplementary material for: Population Dynamics of Wide Compatibility System and Evaluation of Intersubspecific Hybrids by indica-japonica Hybridization in Rice
Source: MDPI journal article supplement (doi:10.3390/plants11151930), 2022-07-26
Supplement: s1 [file s1]

**Table S1:** Genotyping of 950 different rice lines for *S5* locus based on three functional markers *viz.*, S5-InDel, IASP2 and JASP1

| Genotype  | Allelic status | Genotype | Allelic status |
|-----------|----------------|-----------|----------------|-----------|----------------|-----------|----------------|----------|----------------|
| IRGC289   | <i>j</i>       | IRGC15092 | <i>j</i>       | IRGC69845 | <i>j</i>       | IRGC53087 | <i>j</i>       | IRG-21   | <i>n</i>       |
| IRGC328   | <i>j</i>       | IRGC15100 | <i>j</i>       | IRGC69708 | <i>j</i>       | IRGC51498 | <i>n</i>       | IRG-22   | <i>n</i>       |
| IRGC7486  | <i>n</i>       | IRGC16073 | <i>j</i>       | IRGC69367 | <i>n</i>       | IRGC23754 | <i>j</i>       | IRG-23   | <i>i</i>       |
| IRGC7756  | <i>j</i>       | IRGC10658 | <i>n</i>       | IRGC67846 | <i>j</i>       | TPJ 201   | <i>n</i>       | IRG-25   | <i>i</i>       |
| IRGC8193  | <i>j</i>       | IRGC8182  | <i>n</i>       | IRGC67437 | <i>j</i>       | TPJ 203   | <i>n</i>       | IRG-26   | <i>i</i>       |
| IRGC3223  | <i>j</i>       | IRGC5726  | <i>n</i>       | IRGC66745 | <i>j</i>       | TPJ 204   | <i>j</i>       | IRG-27   | <i>i</i>       |
| IRGC15147 | <i>j</i>       | IRGC5766  | <i>j</i>       | IRGC26872 | <i>j</i>       | TPJ 205   | <i>j</i>       | IRG-28   | <i>i</i>       |
| IRGC1797  | <i>n</i>       | IRGC137   | <i>n</i>       | IRGC26178 | <i>j</i>       | TPJ 206   | <i>n</i>       | IRG-31   | <i>i</i>       |
| IRGC5320  | <i>n</i>       | IRGC1220  | <i>j</i>       | IRGC25966 | <i>j</i>       | TPJ 207   | <i>j</i>       | IRG-33   | <i>i</i>       |
| IRGC4059  | <i>j</i>       | IRGC1723  | <i>j</i>       | IRGC25759 | <i>j</i>       | TPJ 209   | <i>j</i>       | IRG-34   | <i>i</i>       |
| IRGC3849  | <i>n</i>       | IRGC6937  | <i>n</i>       | IRGC25239 | <i>j</i>       | TPJ 210   | <i>j</i>       | IRG-35   | <i>i</i>       |
| IRGC3764  | <i>j</i>       | IRGC1972  | <i>n</i>       | IRGC25510 | <i>j</i>       | TPJ 211   | <i>j</i>       | IRG-36   | <i>i</i>       |
| IRGC3408  | <i>j</i>       | IRGC1739  | <i>n</i>       | IRGC25660 | <i>n</i>       | TPJ 214   | <i>n</i>       | IRG-37   | <i>i</i>       |
| IRGC3394  | <i>j</i>       | IRGC1819  | <i>j</i>       | IRGC66758 | <i>n</i>       | TPJ 216   | <i>j</i>       | IRG-38   | <i>i</i>       |
| IRGC3370  | <i>j</i>       | IRGC1789  | <i>j</i>       | IRGC67428 | <i>j</i>       | TPJ 217   | <i>j</i>       | IRG-39   | <i>i</i>       |
| IRGC2263  | <i>j</i>       | IRGC1790  | <i>j</i>       | IRGC61841 | <i>j</i>       | TPJ 218   | <i>j</i>       | IRG-40   | <i>n</i>       |
| IRGC5769  | <i>j</i>       | IRGC16081 | <i>j</i>       | IRGC57692 | <i>j</i>       | TPJ 221   | <i>j</i>       | IRG-41   | <i>i</i>       |
| IRGC10365 | <i>j</i>       | IRGC17052 | <i>j</i>       | IRGC62162 | <i>j</i>       | TPJ 223   | <i>j</i>       | IRG-42   | <i>i</i>       |
| IRGC6309  | <i>j</i>       | IRGC17051 | <i>j</i>       | IRGC63265 | <i>j</i>       | TPJ 224   | <i>j</i>       | IRG-43   | <i>i</i>       |
| IRGC6457  | <i>n</i>       | IRGC16449 | <i>j</i>       | IRGC63121 | <i>j</i>       | TPJ 226   | <i>n</i>       | IRG-44   | <i>i</i>       |
| IRGC5441  | <i>n</i>       | IRGC17906 | <i>n</i>       | IRGC57781 | <i>j</i>       | TPJ 227   | <i>n</i>       | IRG-46   | <i>i</i>       |
| IRGC5097  | <i>n</i>       | IRGC19462 | <i>j</i>       | IRGC66760 | <i>j</i>       | TPJ 228   | <i>n</i>       | IRG-47   | <i>n</i>       |
| IRGC4122  | <i>n</i>       | IRGC18936 | <i>n</i>       | IRGC66756 | <i>j</i>       | TPJ 229   | <i>j</i>       | IRG-49   | <i>i</i>       |
| IRGC8196  | <i>j</i>       | IRGC18425 | <i>j</i>       | IRGC66644 | <i>j</i>       | TPJ 232   | <i>j</i>       | IRG-50   | <i>i</i>       |
| IRGC8261  | <i>n</i>       | IRGC1822  | <i>j</i>       | IRGC66630 | <i>j</i>       | TPJ 233   | <i>n</i>       | IRG-51   | <i>i</i>       |
| IRGC8269  | <i>j</i>       | IRGC19919 | <i>j</i>       | IRGC66529 | <i>n</i>       | TPJ 235   | <i>j</i>       | IRG-53   | <i>i</i>       |
| IRGC8146  | <i>j</i>       | IRGC23364 | <i>j</i>       | IRGC50399 | <i>n</i>       | TPJ 237   | <i>j</i>       | IRG-54   | <i>i</i>       |
| IRGC2245  | <i>j</i>       | IRGC24275 | <i>j</i>       | IRGC48733 | <i>j</i>       | TPJ 238   | <i>j</i>       | IRG-55   | <i>n</i>       |
| IRGC10758 | <i>n</i>       | IRGC18021 | <i>j</i>       | IRGC48493 | <i>j</i>       | TPJ 241   | <i>n</i>       | IRG-56   | <i>n</i>       |
| IRGC2455  | <i>j</i>       | IRGC22712 | <i>j</i>       | IRGC47345 | <i>j</i>       | TPJ 242   | <i>n</i>       | IRG-58   | <i>i</i>       |
| IRGC10760 | <i>j</i>       | IRGC8266  | <i>j</i>       | IRGC43394 | <i>j</i>       | TPJ 244   | <i>j</i>       | IRG-59   | <i>i</i>       |
| IRGC11010 | <i>j</i>       | IRGC65646 | <i>j</i>       | IRGC43372 | <i>j</i>       | TPJ 245   | <i>j</i>       | IRG-60   | <i>i</i>       |
| IRGC11169 | <i>j</i>       | IRGC64914 | <i>j</i>       | IRGC40199 | <i>j</i>       | TPJ 247   | <i>n</i>       | IRG-61   | <i>n</i>       |
| IRGC11336 | <i>n</i>       | IRGC64911 | <i>n</i>       | IRGC38994 | <i>n</i>       | TPJ 248   | <i>j</i>       | IRG-62   | <i>n</i>       |
| IRGC11821 | <i>j</i>       | IRGC64896 | <i>j</i>       | IRGC35724 | <i>j</i>       | TPJ 249   | <i>i</i>       | IRG-63   | <i>i</i>       |
| IRGC12052 | <i>j</i>       | IRGC64888 | <i>j</i>       | IRGC34018 | <i>j</i>       | TPJ 250   | <i>i</i>       | IRG-64   | <i>n</i>       |
| IRGC14530 | <i>j</i>       | IRGC64858 | <i>j</i>       | IRGC32411 | <i>j</i>       | TPJ 192   | <i>i</i>       | IRG-65   | <i>n</i>       |
| IRGC14694 | <i>j</i>       | IRGC64763 | <i>j</i>       | IRGC32406 | <i>n</i>       | IRG-1     | <i>i</i>       | IRG-66   | <i>i</i>       |
| IRGC14725 | <i>j</i>       | IRGC64657 | <i>j</i>       | IRGC32388 | <i>n</i>       | IRG-2     | <i>i</i>       | IRG-67   | <i>n</i>       |
| IRGC14738 | <i>n</i>       | IRGC64656 | <i>j</i>       | IRGC31051 | <i>n</i>       | IRG-9     | <i>i</i>       | IRG-68   | <i>i</i>       |
| IRGC14779 | <i>j</i>       | IRGC71559 | <i>n</i>       | IRGC30921 | <i>n</i>       | IRG-11    | <i>n</i>       | IRG-69   | <i>i</i>       |
| IRGC14791 | <i>j</i>       | IRGC71544 | <i>j</i>       | IRGC27321 | <i>j</i>       | IRG-12    | <i>i</i>       | IRG-70   | <i>i</i>       |
| IRGC14917 | <i>j</i>       | IRGC71493 | <i>j</i>       | IRGC24528 | <i>n</i>       | IRG-14    | <i>i</i>       | IRG-71   | <i>i</i>       |
| IRGC15006 | <i>n</i>       | IRGC69911 | <i>n</i>       | IRGC6741  | <i>n</i>       | IRG-15    | <i>i</i>       | IRG-73   | <i>i</i>       |
| IRGC15023 | <i>j</i>       | IRGC69910 | <i>j</i>       | IRGC24274 | <i>n</i>       | IRG-17    | <i>j</i>       | IRG-74   | <i>i</i>       |
| IRGC15046 | <i>j</i>       | IRGC69861 | <i>j</i>       | IRGC55808 | <i>n</i>       | IRG-18    | <i>n</i>       | IRG-75   | <i>n</i>       |
| IRGC15073 | <i>j</i>       | IRGC69857 | <i>j</i>       | IRGC54201 | <i>j</i>       | IRG-20    | <i>j</i>       | IRG-76   | <i>i</i>       |

**Table S1** (*Contd...*)

| Genotype | Allelic status |
|----------|----------------|----------|----------------|----------|----------------|----------|----------------|----------|----------------|
| IRG-77   | <i>i</i>       | IRG-128  | <i>n</i>       | IRG-183  | <i>i</i>       | IRG-265  | <i>i</i>       | IRG-318  | <i>i</i>       |
| IRG-78   | <i>i</i>       | IRG-129  | <i>i</i>       | IRG-185  | <i>n</i>       | IRG-267  | <i>i</i>       | IRG-320  | <i>i</i>       |
| IRG-79   | <i>n</i>       | IRG-130  | <i>i</i>       | IRG-187  | <i>i</i>       | IRG-268  | <i>i</i>       | IRG-322  | <i>i</i>       |
| IRG-80   | <i>i</i>       | IRG-131  | <i>i</i>       | IRG-190  | <i>i</i>       | IRG-269  | <i>i</i>       | IRG-323  | <i>i</i>       |
| IRG-81   | <i>i</i>       | IRG-133  | <i>n</i>       | IRG-193  | <i>i</i>       | IRG-270  | <i>i</i>       | IRG-324  | <i>n</i>       |
| IRG-82   | <i>n</i>       | IRG-134  | <i>i</i>       | IRG-196  | <i>i</i>       | IRG-271  | <i>n</i>       | IRG-325  | <i>i</i>       |
| IRG-83   | <i>i</i>       | IRG-135  | <i>i</i>       | IRG-198  | <i>i</i>       | IRG-272  | <i>i</i>       | IRG-326  | <i>n</i>       |
| IRG-84   | <i>i</i>       | IRG-136  | <i>i</i>       | IRG-200  | <i>n</i>       | IRG-273  | <i>i</i>       | IRG-327  | <i>i</i>       |
| IRG-85   | <i>i</i>       | IRG-137  | <i>n</i>       | IRG-201  | <i>i</i>       | IRG-274  | <i>i</i>       | IRG-328  | <i>i</i>       |
| IRG-86   | <i>i</i>       | IRG-138  | <i>i</i>       | IRG-204  | <i>n</i>       | IRG-275  | <i>i</i>       | IRG-329  | <i>i</i>       |
| IRG-87   | <i>i</i>       | IRG-139  | <i>n</i>       | IRG-205  | <i>i</i>       | IRG-276  | <i>i</i>       | IRG-333  | <i>n</i>       |
| IRG-88   | <i>i</i>       | IRG-140  | <i>i</i>       | IRG-211  | <i>i</i>       | IRG-277  | <i>i</i>       | IRG-335  | <i>i</i>       |
| IRG-89   | <i>i</i>       | IRG-141  | <i>n</i>       | IRG-212  | <i>i</i>       | IRG-278  | <i>i</i>       | IRG-337  | <i>n</i>       |
| IRG-90   | <i>i</i>       | IRG-142  | <i>n</i>       | IRG-214  | <i>i</i>       | IRG-280  | <i>i</i>       | IRG-338  | <i>i</i>       |
| IRG-91   | <i>i</i>       | IRG-143  | <i>n</i>       | IRG-215  | <i>i</i>       | IRG-281  | <i>i</i>       | IRG-340  | <i>i</i>       |
| IRG-92   | <i>n</i>       | IRG-144  | <i>n</i>       | IRG-217  | <i>i</i>       | IRG-282  | <i>i</i>       | IRG-341  | <i>n</i>       |
| IRG-93   | <i>i</i>       | IRG-149  | <i>i</i>       | IRG-218  | <i>i</i>       | IRG-283  | <i>i</i>       | IRG-342  | <i>i</i>       |
| IRG-94   | <i>i</i>       | IRG-150  | <i>n</i>       | IRG-219  | <i>n</i>       | IRG-284  | <i>i</i>       | IRG-343  | <i>i</i>       |
| IRG-95   | <i>i</i>       | IRG-151  | <i>i</i>       | IRG-223  | <i>i</i>       | IRG-285  | <i>i</i>       | IRG-345  | <i>i</i>       |
| IRG-96   | <i>i</i>       | IRG-152  | <i>i</i>       | IRG-224  | <i>i</i>       | IRG-286  | <i>i</i>       | IRG-346  | <i>i</i>       |
| IRG-97   | <i>i</i>       | IRG-153  | <i>i</i>       | IRG-227  | <i>i</i>       | IRG-287  | <i>i</i>       | IRG-347  | <i>i</i>       |
| IRG-98   | <i>n</i>       | IRG-154  | <i>i</i>       | IRG-229  | <i>i</i>       | IRG-288  | <i>i</i>       | IRG-348  | <i>i</i>       |
| IRG-99   | <i>i</i>       | IRG-155  | <i>i</i>       | IRG-230  | <i>i</i>       | IRG-289  | <i>i</i>       | IRG-351  | <i>i</i>       |
| IRG-101  | <i>i</i>       | IRG-156  | <i>i</i>       | IRG-231  | <i>i</i>       | IRG-290  | <i>i</i>       | IRG-353  | <i>n</i>       |
| IRG-102  | <i>i</i>       | IRG-157  | <i>i</i>       | IRG-232  | <i>i</i>       | IRG-291  | <i>i</i>       | IRG-354  | <i>i</i>       |
| IRG-103  | <i>i</i>       | IRG-158  | <i>i</i>       | IRG-233  | <i>i</i>       | IRG-292  | <i>i</i>       | IRG-356  | <i>i</i>       |
| IRG-104  | <i>i</i>       | IRG-159  | <i>i</i>       | IRG-237  | <i>i</i>       | IRG-293  | <i>i</i>       | IRG-361  | <i>n</i>       |
| IRG-105  | <i>i</i>       | IRG-160  | <i>i</i>       | IRG-239  | <i>n</i>       | IRG-294  | <i>i</i>       | IRG-363  | <i>i</i>       |
| IRG-106  | <i>i</i>       | IRG-161  | <i>i</i>       | IRG-240  | <i>i</i>       | IRG-295  | <i>i</i>       | IRG-364  | <i>i</i>       |
| IRG-107  | <i>n</i>       | IRG-162  | <i>i</i>       | IRG-241  | <i>i</i>       | IRG-296  | <i>i</i>       | IRG-365  | <i>i</i>       |
| IRG-108  | <i>i</i>       | IRG-163  | <i>i</i>       | IRG-242  | <i>n</i>       | IRG-297  | <i>i</i>       | IRG-366  | <i>i</i>       |
| IRG-109  | <i>i</i>       | IRG-164  | <i>n</i>       | IRG-243  | <i>n</i>       | IRG-298  | <i>n</i>       | IRG-368  | <i>i</i>       |
| IRG-110  | <i>n</i>       | IRG-165  | <i>n</i>       | IRG-244  | <i>n</i>       | IRG-299  | <i>i</i>       | IRG-369  | <i>i</i>       |
| IRG-112  | <i>n</i>       | IRG-166  | <i>i</i>       | IRG-245  | <i>n</i>       | IRG-300  | <i>i</i>       | IRG-371  | <i>i</i>       |
| IRG-113  | <i>i</i>       | IRG-167  | <i>n</i>       | IRG-247  | <i>n</i>       | IRG-303  | <i>i</i>       | IRG-373  | <i>i</i>       |
| IRG-114  | <i>i</i>       | IRG-168  | <i>i</i>       | IRG-248  | <i>i</i>       | IRG-304  | <i>i</i>       | IRG-374  | <i>n</i>       |
| IRG-115  | <i>n</i>       | IRG-169  | <i>n</i>       | IRG-249  | <i>n</i>       | IRG-305  | <i>i</i>       | IRG-377  | <i>i</i>       |
| IRG-116  | <i>n</i>       | IRG-170  | <i>i</i>       | IRG-251  | <i>n</i>       | IRG-306  | <i>i</i>       | IRG-379  | <i>i</i>       |
| IRG-117  | <i>i</i>       | IRG-171  | <i>i</i>       | IRG-254  | <i>i</i>       | IRG-307  | <i>i</i>       | IRG-381  | <i>i</i>       |
| IRG-118  | <i>i</i>       | IRG-173  | <i>n</i>       | IRG-255  | <i>n</i>       | IRG-308  | <i>i</i>       | IRG-383  | <i>i</i>       |
| IRG-120  | <i>i</i>       | IRG-174  | <i>i</i>       | IRG-256  | <i>i</i>       | IRG-309  | <i>i</i>       | IRG-384  | <i>i</i>       |
| IRG-121  | <i>n</i>       | IRG-175  | <i>i</i>       | IRG-257  | <i>i</i>       | IRG-311  | <i>n</i>       | IRG-385  | <i>i</i>       |
| IRG-122  | <i>i</i>       | IRG-176  | <i>i</i>       | IRG-258  | <i>n</i>       | IRG-312  | <i>i</i>       | IRG-387  | <i>i</i>       |
| IRG-123  | <i>i</i>       | IRG-177  | <i>i</i>       | IRG-259  | <i>i</i>       | IRG-313  | <i>i</i>       | IRG-388  | <i>i</i>       |
| IRG-124  | <i>i</i>       | IRG-178  | <i>i</i>       | IRG-260  | <i>i</i>       | IRG-314  | <i>i</i>       | Sneha    | <i>i</i>       |
| IRG-125  | <i>n</i>       | IRG-179  | <i>n</i>       | IRG-262  | <i>i</i>       | IRG-315  | <i>i</i>       | Heera    | <i>i</i>       |
| IRG-126  | <i>i</i>       | IRG-180  | <i>i</i>       | IRG-263  | <i>i</i>       | IRG-316  | <i>i</i>       | IRBB 1   | <i>i</i>       |
| IRG-127  | <i>n</i>       | IRG-181  | <i>n</i>       | IRG-264  | <i>i</i>       | IRG-317  | <i>i</i>       | Rudra    | <i>i</i>       |

**Table S1** (Contd...)

| Genotype       | Allelic status | Genotype     | Allelic status | Genotype    | Allelic status | Genotype         | Allelic status |
|----------------|----------------|--------------|----------------|-------------|----------------|------------------|----------------|
| Nipponbare     | <i>j</i>       | FL 478       | <i>i</i>       | IRBB 14     | <i>i</i>       | Manhar           | <i>i</i>       |
| Lalitagiri     | <i>i</i>       | Pant Dhan 11 | <i>i</i>       | IRBB 8      | <i>i</i>       | Vikash           | <i>i</i>       |
| C101PKT        | <i>i</i>       | Himalaya2    | <i>i</i>       | PR 106      | <i>i</i>       | Sidhanta         | <i>i</i>       |
| Jaldi Dhan 6   | <i>i</i>       | Kalinga-I    | <i>i</i>       | IRBB 60     | <i>i</i>       | Prasad           | <i>i</i>       |
| Jaldi Dhan 13  | <i>i</i>       | K 332        | <i>i</i>       | IRBB-59     | <i>i</i>       | IR-64            | <i>i</i>       |
| Shankar        | <i>i</i>       | Rasi         | <i>i</i>       | IRBB 13     | <i>i</i>       | Pant Sankar Dhan | <i>i</i>       |
| Ghanteshwari   | <i>i</i>       | ADT 45       | <i>i</i>       | IRBB 55     | <i>i</i>       | Gajapati         | <i>i</i>       |
| Parijat        | <i>i</i>       | Satya        | <i>i</i>       | CSR 10      | <i>i</i>       | Pusa 205         | <i>i</i>       |
| Subhadra       | <i>i</i>       | IRAT 144     | <i>n</i>       | IRBB 4      | <i>i</i>       | IRBB-211         | <i>i</i>       |
| C102PKT        | <i>i</i>       | IRBLBB-5M    | <i>i</i>       | Pusa 33     | <i>i</i>       | PAU 201          | <i>i</i>       |
| BL-245         | <i>i</i>       | PR 108       | <i>i</i>       | Suphala     | <i>i</i>       | Ratna            | <i>i</i>       |
| Badami         | <i>i</i>       | Dhara Heera  | <i>i</i>       | IRBB-8      | <i>i</i>       | PR 115           | <i>j</i>       |
| BI-122         | <i>j</i>       | ASD 16       | <i>i</i>       | MI 48       | <i>i</i>       | Ajay             | <i>n</i>       |
| ADT-36         | <i>i</i>       | A57-115-4    | <i>i</i>       | Jyoti       | <i>i</i>       | Swarna mukhi     | <i>i</i>       |
| Nialgiri       | <i>i</i>       | IRBLZ5-CA    | <i>i</i>       | IR-8        | <i>i</i>       | NDR 2026         | <i>i</i>       |
| CO 39          | <i>i</i>       | IRBLB-B      | <i>i</i>       | Pusa 44     | <i>i</i>       | HKR 120          | <i>i</i>       |
| MAS 868        | <i>i</i>       | TKM-9        | <i>i</i>       | HKR-55      | <i>i</i>       | Sarathi          | <i>i</i>       |
| Rajendra       | <i>i</i>       | Sadabahar    | <i>i</i>       | Erramallalu | <i>i</i>       | HUBR-2-1         | <i>i</i>       |
| Poornima       | <i>i</i>       | Vandana      | <i>i</i>       | PR111       | <i>i</i>       | IRAT 112         | <i>i</i>       |
| MAS 109        | <i>i</i>       | UPLRI 7      | <i>i</i>       | Pratap      | <i>i</i>       | MTU1010          | <i>i</i>       |
| Baranideep     | <i>i</i>       | Kranti       | <i>i</i>       | SKR 126     | <i>i</i>       | ADT 37           | <i>i</i>       |
| Karjat-1       | <i>i</i>       | Saathi       | <i>i</i>       | HUR-4-3     | <i>i</i>       | Pusa Sugandh 5   | <i>i</i>       |
| IR 50          | <i>i</i>       | Virendra     | <i>i</i>       | PR 114      | <i>i</i>       | HUR-3022         | <i>j</i>       |
| C101 LAC       | <i>i</i>       | KALYANI 1    | <i>i</i>       | MTU 3626    | <i>i</i>       | PRH 10           | <i>j</i>       |
| Naggar Dhan    | <i>i</i>       | SKAU 5       | <i>i</i>       | IR 24       | <i>i</i>       | PNR 519          | <i>i</i>       |
| Deuteshwari    | <i>i</i>       | SKAU 27      | <i>j</i>       | Neela       | <i>i</i>       | Jaya             | <i>i</i>       |
| VL Dhan 221    | <i>i</i>       | SKAU 382     | <i>i</i>       | PR 113      | <i>i</i>       | Pant Dhan 12     | <i>n</i>       |
| Khandagiri     | <i>i</i>       | RIL-45       | <i>i</i>       | Keshav      | <i>i</i>       | IC-258220        | <i>i</i>       |
| Himalaya 799   | <i>i</i>       | CN A 4125    | <i>i</i>       | ADT-38      | <i>i</i>       | VSR 8            | <i>i</i>       |
| HPR 1068       | <i>i</i>       | VLK 39       | <i>i</i>       | PR 116      | <i>i</i>       | Orugullu         | <i>i</i>       |
| Pant Dhan 6    | <i>i</i>       | Himdhan      | <i>i</i>       | IR 36       | <i>i</i>       | Karma Mahsuri    | <i>i</i>       |
| Himalaya1      | <i>i</i>       | CT-10006     | <i>i</i>       | Pathara     | <i>j</i>       | IRBB-203         | <i>n</i>       |
| ND 118         | <i>i</i>       | CH 45        | <i>i</i>       | Daya        | <i>i</i>       | Tai Pei 309      | <i>i</i>       |
| Heibao         | <i>i</i>       | PC 19        | <i>i</i>       | Leimphore   | <i>i</i>       | MAS-946          | <i>i</i>       |
| Palam Dhan 957 | <i>i</i>       | Van Prabha   | <i>i</i>       | IRBL9-W     | <i>i</i>       | ASD 18           | <i>i</i>       |
| Ananda         | <i>i</i>       | Himalaya2216 | <i>i</i>       | Sebati      | <i>i</i>       | Red Trinaini     | <i>i</i>       |
| Jogesh         | <i>i</i>       | Samautha     | <i>i</i>       | Samleshwari | <i>i</i>       | IRBB 21          | <i>i</i>       |
| Danteshwari    | <i>i</i>       | RP 2421      | <i>n</i>       | Surendra    | <i>i</i>       | PR 120           | <i>i</i>       |
| IR72           | <i>n</i>       | Kalyani-II   | <i>i</i>       | Kharavada   | <i>i</i>       | CR 2461-9        | <i>i</i>       |
| Kalinga-II     | <i>i</i>       | SR 1         | <i>i</i>       | Shatabdi    | <i>i</i>       | UPRI-2003-45     | <i>i</i>       |
| JR 201         | <i>i</i>       | Dular        | <i>n</i>       | Red Triveni | <i>i</i>       | PNR381           | <i>i</i>       |
| C101A51(Piz-5) | <i>j</i>       | IC-248199    | <i>i</i>       | Udayagiri   | <i>i</i>       | Punjab Mehak1    | <i>i</i>       |
| K 429          | <i>i</i>       | IRBB 5       | <i>i</i>       | NILAGIRI    | <i>i</i>       | PNR 381          | <i>i</i>       |
| Piz-5          | <i>i</i>       | IRBB 10      | <i>i</i>       | Kharavela   | <i>i</i>       | Jayati           | <i>i</i>       |
| Karjat-184     | <i>i</i>       | IRBB3        | <i>i</i>       | CR 143-2-2  | <i>i</i>       | Varalu           | <i>i</i>       |

**Table S1** (Contd...)

| <b>Genotype</b>  | <b>Allelic status</b> | <b>Genotype</b>        | <b>Allelic status</b> | <b>Genotype</b>     | <b>Allelic status</b> |
|------------------|-----------------------|------------------------|-----------------------|---------------------|-----------------------|
| CT 10006         | <i>i</i>              | Anjali                 | <i>i</i>              | Sitwa Dhan          | <i>i</i>              |
| Sona Khau        | <i>i</i>              | DV 85                  | <i>n</i>              | PR118               | <i>i</i>              |
| Chandrasahini    | <i>n</i>              | 1-AC 25                | <i>j</i>              | Gouri               | <i>i</i>              |
| HPR 2143         | <i>n</i>              | IRAT 240(IREM950)      | <i>i</i>              | Ananga              | <i>i</i>              |
| MAS 946-1        | <i>i</i>              | CR-2363-26             | <i>j</i>              | Pant dhan 4         | <i>i</i>              |
| PRR 101          | <i>i</i>              | Selected Sabarmati     | <i>i</i>              | Muskan              | <i>i</i>              |
| PRR 125          | <i>i</i>              | MTU 1010               | <i>i</i>              | IR 66               | <i>i</i>              |
| PRR 102          | <i>i</i>              | Kataktara              | <i>n</i>              | HUR-Pm-7m AVTBT     | <i>i</i>              |
| PRR113           | <i>i</i>              | VOH-PCR-3110           | <i>i</i>              | Abhaya              | <i>i</i>              |
| PRR 126          | <i>i</i>              | Saanwal Basmati        | <i>i</i>              | OYR 69              | <i>i</i>              |
| MAS 25           | <i>i</i>              | Lalan Kanda            | <i>n</i>              | ADT 38              | <i>i</i>              |
| RNRM 7           | <i>i</i>              | C 1268-7-10            | <i>i</i>              | CR 2499             | <i>i</i>              |
| Pusa Sugandh 2   | <i>i</i>              | BJ-1                   | <i>n</i>              | Pusa 1460           | <i>i</i>              |
| VL7-3            | <i>i</i>              | VI-95-6-3-9-4          | <i>i</i>              | Sarjoo 52           | <i>i</i>              |
| VLT-6            | <i>i</i>              | VOH-PCR-3114           | <i>i</i>              | UPRI-2003-24        | <i>i</i>              |
| Falguna          | <i>i</i>              | CR 2494                | <i>i</i>              | UPRI-2003-18        | <i>i</i>              |
| Haryana Basmati1 | <i>i</i>              | 96718 (CG20)           | <i>i</i>              | Narendra Usar Dhan3 | <i>i</i>              |
| RIL-10           | <i>i</i>              | BROWN GORA             | <i>n</i>              | NDR 359             | <i>i</i>              |
| Pant dhan 19     | <i>i</i>              | Tetep Original         | <i>i</i>              | NDR 97              | <i>i</i>              |
| NDR- 8015-1      | <i>i</i>              | Peeli badam            | <i>n</i>              | Pusa 1176           | <i>n</i>              |
| Pusa Sugandh 3   | <i>i</i>              | Goal malati            | <i>n</i>              | Bhadrakali          | <i>i</i>              |
| Pantsankardhan3  | <i>i</i>              | VL-88-97-1-7           | <i>i</i>              | Shiva               | <i>i</i>              |
| Samanta          | <i>i</i>              | Tripura Medicinal rice | <i>i</i>              | CR 2364-25          | <i>i</i>              |
| Tapaswani        | <i>i</i>              | Kamlesh                | <i>n</i>              | IR 77384            | <i>i</i>              |
| ARS 36           | <i>i</i>              | Hassan serai           | <i>i</i>              | Narendra Usar Dhan2 | <i>i</i>              |
| HKR-26           | <i>i</i>              | IR-78908               | <i>j</i>              | SKAU 220            | <i>i</i>              |
| HPR 2083         | <i>i</i>              | Joymati                | <i>n</i>              | PRR 105             | <i>i</i>              |
| CAN 4136         | <i>i</i>              | VI-7626                | <i>n</i>              | PRR 111             | <i>i</i>              |
| Mahamaya         | <i>i</i>              | Abhishek               | <i>n</i>              | PRR 117             | <i>i</i>              |
| Bhubana          | <i>i</i>              | B6144-MR-6-0-0         | <i>n</i>              | PRR 119             | <i>i</i>              |
| Pant dhan 10     | <i>i</i>              | Dhoubi                 | <i>i</i>              | PRR 103             | <i>i</i>              |
| BL-142           | <i>i</i>              | PMK-2                  | <i>i</i>              | PRR 106             | <i>i</i>              |
| Sharbati Typical | <i>i</i>              | VL-9891                | <i>i</i>              | PRR 123             | <i>i</i>              |
| OYR 128          | <i>n</i>              | Seond Basmati          | <i>i</i>              | PRR 114             | <i>i</i>              |
| CNA 4130         | <i>i</i>              | HPR 2104               | <i>i</i>              | PRR 120             | <i>i</i>              |
| OYC 183          | <i>n</i>              | VL-10091               | <i>n</i>              | PRR 124             | <i>i</i>              |
| Bhanja           | <i>i</i>              | Nagina 22              | <i>n</i>              | PRR 107             | <i>i</i>              |
| P1463-02-1-1     | <i>i</i>              | Basmati 564            | <i>i</i>              | PRR 115             | <i>i</i>              |
| BJ-1(Purple awn) | <i>n</i>              | Sah Pasand             | <i>n</i>              | PRR 104             | <i>i</i>              |
| Chandana         | <i>i</i>              | Chimbalate Basmati     | <i>i</i>              | PRR 108             | <i>i</i>              |
| Urvashi          | <i>i</i>              | PMK-1                  | <i>i</i>              | PRR 121             | <i>i</i>              |
| Pant dhan 16     | <i>i</i>              | Dom Siah               | <i>i</i>              | Pant dhan 18        | <i>i</i>              |
| P1490-03-        | <i>i</i>              | TKM -6                 | <i>n</i>              | Indravati           | <i>i</i>              |
| CSR 27           | <i>i</i>              | Salam pikit            | <i>n</i>              | Pant Sugandh Dhan17 | <i>i</i>              |
| China 988        | <i>i</i>              | SB-3000                | <i>i</i>              | HUR-200-57-1        | <i>i</i>              |

**Table S1** (Contd...)

| <b>Genotype</b>      | <b>Allelic status</b> | <b>Genotype</b>    | <b>Allelic status</b> | <b>Genotype</b>    | <b>Allelic status</b> |
|----------------------|-----------------------|--------------------|-----------------------|--------------------|-----------------------|
| Pant dhan 15         | <i>i</i>              | WGL 32100          | <i>i</i>              | Khara Munga        | <i>i</i>              |
| JGL_11727            | <i>i</i>              | MR-220             | <i>i</i>              | IR 70              | <i>i</i>              |
| Mahanadi             | <i>i</i>              | Raja Vaellu        | <i>i</i>              | ADT 39             | <i>i</i>              |
| Sahbhagi Dhan        | <i>i</i>              | CR-246-16          | <i>i</i>              | Haldimuri          | <i>n</i>              |
| Pant Sugandh Dhan15  | <i>i</i>              | Phunchi            | <i>i</i>              | MTU 7029           | <i>i</i>              |
| Bhuman San           | <i>i</i>              | Pusa Basmati 1121  | <i>i</i>              | MTU 2067           | <i>i</i>              |
| JR 75                | <i>i</i>              | Lalat              | <i>i</i>              | PDKV- Chinoor-2    | <i>i</i>              |
| VOH-PCR-3119         | <i>i</i>              | Improved Sabarmati | <i>i</i>              | Pusa 1401          | <i>i</i>              |
| CR-1009              | <i>i</i>              | Tompha Khau        | <i>i</i>              | ON-1               | <i>i</i>              |
| JR 503               | <i>i</i>              | CN-1268-7          | <i>i</i>              | P-1280-SAF-06      | <i>i</i>              |
| CO-37                | <i>i</i>              | WGL 14             | <i>i</i>              | Swarna Sub 1       | <i>i</i>              |
| Sumati               | <i>i</i>              | Hema               | <i>i</i>              | ADT 42             | <i>i</i>              |
| SAF-1221-83          | <i>i</i>              | UPRVS-98-26        | <i>i</i>              | MTU 5249 (Vajram)  | <i>i</i>              |
| P 1447               | <i>i</i>              | Pusa 1174          | <i>i</i>              | MTU 4870 (Deepti)  | <i>i</i>              |
| P1447-00-5-1         | <i>i</i>              | Super Basmati      | <i>i</i>              | Tilak Chandan      | <i>i</i>              |
| Khao Daen Krai       | <i>n</i>              | Pusa 1301          | <i>i</i>              | Pusa-33            | <i>i</i>              |
| Khao-Khao            | <i>i</i>              | Kanak              | <i>i</i>              | Mahalaxmi          | <i>i</i>              |
| Sona Mahsuri         | <i>n</i>              | Indira sona        | <i>i</i>              | Meher              | <i>i</i>              |
| IC-86318             | <i>i</i>              | PRR 109            | <i>i</i>              | Pusa Basmati 1     | <i>i</i>              |
| IRBB 54              | <i>i</i>              | PRR 110            | <i>i</i>              | Pratikshya         | <i>i</i>              |
| CSR 13               | <i>i</i>              | PRR 127            | <i>i</i>              | Jhulhat            | <i>i</i>              |
| HUR-105              | <i>i</i>              | PRR 116            | <i>i</i>              | NDR 9830144        | <i>i</i>              |
| Raskandam            | <i>i</i>              | PRR 122            | <i>i</i>              | MTU 1001 (Vijetha) | <i>i</i>              |
| HUR 105              | <i>i</i>              | PRR 118            | <i>i</i>              | Santepheap         | <i>i</i>              |
| Indira Sugandh Dhan1 | <i>i</i>              | HUR-36             | <i>i</i>              | Prachi             | <i>n</i>              |
| Manaswini            | <i>n</i>              | Kalinga-III        | <i>i</i>              | Uphar              | <i>i</i>              |
| RAU3002              | <i>i</i>              | RR 166-645         | <i>n</i>              | Dubraj             | <i>i</i>              |
| RR 8585              | <i>i</i>              | NDR- 8011          | <i>i</i>              | Ramachandi         | <i>i</i>              |
| CSR 23               | <i>i</i>              | GSR-2-1-46         | <i>i</i>              | Jagabandhu         | <i>i</i>              |
| Kudrat-3             | <i>i</i>              | Malviya Dhan       | <i>i</i>              | 4010               | <i>i</i>              |
| RAU 3061             | <i>i</i>              | C 22               | <i>i</i>              | CRRRI Black Aroma  | <i>i</i>              |
| PR 600               | <i>i</i>              | DHMAS-70G-16429    | <i>i</i>              | CSR 36             | <i>i</i>              |
| CN-1793              | <i>i</i>              | HKR-39             | <i>i</i>              | Acharmati          | <i>n</i>              |
| NDR 625              | <i>i</i>              | Ranbir Basmati     | <i>i</i>              | Chinikamini        | <i>n</i>              |
| Sagar dambha         | <i>i</i>              | T23                | <i>i</i>              | Singhuva Malet     | <i>i</i>              |
| JGL-3828             | <i>i</i>              | Jeeraga Sambha     | <i>i</i>              | NDR 9830135        | <i>i</i>              |
| P1460                | <i>i</i>              | ASD 19             | <i>i</i>              | Intan              | <i>i</i>              |
| Pusa1342             | <i>i</i>              | Basmati 370        | <i>i</i>              | NDKN-3327 (SN)     | <i>i</i>              |
| MR-219               | <i>i</i>              | Zang Bhuman        | <i>i</i>              | Taraori Basmati    | <i>i</i>              |
| UPRI-2003-15         | <i>i</i>              | IC-2127            | <i>i</i>              | TMK-6              | <i>i</i>              |
| Sambha Mahsuri       | <i>i</i>              | VOH-PCR-3113       | <i>i</i>              | Rambha             | <i>i</i>              |
| Sharbati             | <i>i</i>              | TYPE-3             | <i>i</i>              | Kalanamak-3119     | <i>i</i>              |
| HKR-200-57-1         | <i>i</i>              | Nagina 12          | <i>i</i>              | Basmati 386        | <i>i</i>              |
| WGL-23985            | <i>i</i>              | Sonasal            | <i>i</i>              | VOH-PCR-3139       | <i>i</i>              |
| Rajendra basmati     | <i>i</i>              | Bhuman Nagau       | <i>i</i>              | Gaur1              | <i>i</i>              |

**Table S1** (Contd...)

| Genotype  | Allelic status | Genotype | Allelic status | Genotype | Allelic status |
|-----------|----------------|----------|----------------|----------|----------------|
| Gaur2     | <i>i</i>       | GR3      | <i>i</i>       | Gar13    | <i>i</i>       |
| Gaur10    | <i>i</i>       | GR4      | <i>i</i>       | GR101    | <i>i</i>       |
| Gaur100   | <i>i</i>       | GR5      | <i>n</i>       | GR102    | <i>i</i>       |
| Gar1      | <i>i</i>       | GR6      | <i>i</i>       | GR103    | <i>i</i>       |
| Gar2      | <i>i</i>       | GR7      | <i>i</i>       | GR104    | <i>i</i>       |
| GR11      | <i>n</i>       | GR8      | <i>n</i>       | Gurjari  | <i>i</i>       |
| GR12      | <i>i</i>       | GR9      | <i>n</i>       | SK20     | <i>i</i>       |
| J280      | <i>i</i>       | Dandi    | <i>i</i>       | Mahsuri  | <i>i</i>       |
| P Basmati | <i>i</i>       |          |                |          |                |

Where *n*-neutral allele (*S5-n*), *i* - *indica* allele (*S5-i*) and *j* – *japonica* allele (*S5-j*)

**Table S2.** List of primers used for screening of the rice germplasm

| Primer name          | LG | Target      | Sequence                        | Tm (°C) | Product size |          |          |
|----------------------|----|-------------|---------------------------------|---------|--------------|----------|----------|
|                      |    |             |                                 |         | <i>i</i>     | <i>j</i> | <i>n</i> |
| S5-InDel             | 6  | <i>S5-n</i> | F-CCTACGTTTGACTGCCTGCCTG        | 61.0    | 417bp        | 417bp    | 281bp    |
|                      |    |             | R-CTACACGCGGCTTCGGGAAAGC        | 63.4    |              |          |          |
| S5-ELSP1<br>S5-IASP2 | 6  | <i>S5-i</i> | F-GACAGCAGCATCAACGACTTCC        | 59.1    | 527bp        | No. Amp  | 527bp    |
|                      |    |             | R-TCGTCAGTGGGCAAGCAGTAGCTG      | 63.3    |              |          |          |
| S5-JASP1<br>S5-ELSP2 | 6  | <i>S5-j</i> | F-ACCCTGATATTCTGAGTTACAAGGCATTA | 57.4    | No. Amp      | 325bp    | No. Amp  |
|                      |    |             | R-GCTCTTGATGTCCGGTGATACC        |         |              |          |          |

ELSP, external locus specific primer; IASP, *indica* allele specific primer; JASP, *japonica* allele specific primer

**Table S3:** List of wide compatible varieties identified

| Genotypes | Genotypes | Genotypes  | Genotypes        |
|-----------|-----------|------------|------------------|
| IRGC7486  | TPJ 210   | IRG-144    | Chandrasahini    |
| IRGC1797  | TPJ 218   | IRG-150    | HPR 2143         |
| IRGC5320  | TPJ 229   | IRG-164    | OYR 128          |
| IRGC3849  | TPJ 232   | IRG-165    | OYC 183          |
| IRGC6457  | TPJ 233   | IRG-167    | BJ-1(Purple awn) |
| IRGC5441  | TPJ 238   | IRG-169    | DV 85            |
| IRGC5097  | TPJ 245   | IRG-173    | Kataktara        |
| IRGC4122  | TPJ 247   | IRG-179    | Lalan Kanda      |
| IRGC8261  | TPJ 250   | IRG-181    | BJ-1             |
| IRGC10758 | IRG-15    | IRG-185    | BROWN GORA       |
| IRGC11336 | IRG-21    | IRG-200    | Peeli badam      |
| IRGC14738 | IRG-22    | IRG-204    | Goal malati      |
| IRGC15006 | IRG-40    | IRG-219    | Kamlesh          |
| IRGC10658 | IRG-47    | IRG-239    | Joymati          |
| IRGC8182  | IRG-55    | IRG-242    | VL-7626          |
| IRGC5726  | IRG-56    | IRG-243    | Abhishek         |
| IRGC137   | IRG-61    | IRG-244    | B6144-MR-6-0-0   |
| IRGC6937  | IRG-62    | IRG-245    | VL-10091         |
| IRGC1972  | IRG-64    | IRG-247    | Nagina 22        |
| IRGC1739  | IRG-65    | IRG-249    | Sah Pasand       |
| IRGC17906 | IRG-67    | IRG-251    | TKM -6           |
| IRGC18936 | IRG-75    | IRG-255    | Salam pikit      |
| IRGC64911 | IRG-79    | IRG-258    | Pusa 1176        |
| IRGC71559 | IRG-82    | IRG-271    | Khao Daen Krai   |
| IRGC69911 | IRG-92    | IRG-298    | Sona Mahsuri     |
| IRGC25660 | IRG-98    | IRG-311    | Manaswini        |
| IRGC66758 | IRG-107   | IRG-324    | RR 166-645       |
| IRGC66529 | IRG-110   | IRG-326    | Haldimuri        |
| IRGC50399 | IRG-112   | IRG-333    | Prachi           |
| IRGC38994 | IRG-115   | IRG-337    | Acharmati        |
| IRGC32406 | IRG-116   | IRG-341    | Chinikamini      |
| IRGC32388 | IRG-121   | IRG-353    | GR5              |
| IRGC31051 | IRG-125   | IRG-361    | GR8              |
| IRGC30921 | IRG-127   | IRG-374    | GR9              |
| IRGC24528 | IRG-128   | IR72       | GR11             |
| IRGC6741  | IRG-133   | IRAT 144   |                  |
| IRGC24274 | IRG-137   | RP 2421    |                  |
| IRGC55808 | IRG-139   | Dular      |                  |
| TPJ 203   | IRG-141   | Ajay       |                  |
| TPJ 205   | IRG-142   | PantDhan12 |                  |
| TPJ 206   | IRG-143   | IRBB-203   |                  |

**Table S4:** Mean of hybrids for spikelet fertility (%) in *indica* and *japonica* subgroups

| Groups       | Count | Mean of spikelet fertility (%) |         |          |         |
|--------------|-------|--------------------------------|---------|----------|---------|
|              |       | Aduthurai                      | Cuttack | Barapani | Overall |
| <i>i x n</i> | 82    | 69.00                          | 74.00   | 72.46    | 71.81   |
| <i>j x n</i> | 82    | 71.30                          | 72.83   | 72.69    | 72.27   |
| <b>Total</b> | 164   | 70.14                          | 73.36   | 72.57    | 72.04   |

Where *n* - neutral allele (*S5-n*), *i* - *indica* allele (*S5-i*) and *j* – *japonica* allele (*S5-j*)

**Table S5:** Mean performance of hybrids across three locations

| Cross combination        | Genotypes | PH (cm) | NT   | PL   | FG    | UFG   | SF (%) | YPP (gm) |
|--------------------------|-----------|---------|------|------|-------|-------|--------|----------|
| Pusa 44*IRG-337          | WCH1      | 140.1   | 28.5 | 4.9  | 94.7  | 39.2  | 70.7   | 24.7     |
| Pusa 44*IRG 2421         | WCH2      | 122.0   | 20.2 | 6.2  | 135.7 | 14.6  | 90.3   | 21.7     |
| Pusa 44*IRG-141          | WCH3      | 114.7   | 25.1 | 9.7  | 84.4  | 27.0  | 77.5   | 29.9     |
| Pusa 44*Joymati          | WCH4      | 117.6   | 23.0 | 7.1  | 127.2 | 33.8  | 79.1   | 35.4     |
| Pusa44*Kamlesh           | WCH5      | 108.2   | 18.4 | 8.1  | 87.8  | 49.8  | 62.6   | 17.8     |
| Pusa 44*TPJ 206          | WCH6      | 142.4   | 29.2 | 10.8 | 154.7 | 122.3 | 55.7   | 20.4     |
| Pusa 44*IRGC32406        | WCH7      | 112.0   | 26.2 | 4.3  | 113.4 | 78.2  | 59.0   | 23.9     |
| Pusa 44*IRGC6937         | WCH8      | 121.9   | 24.9 | 11.6 | 143.2 | 54.7  | 70.3   | 34.6     |
| Pusa 44*Nagina 22        | WCH9      | 112.7   | 24.3 | 7.6  | 110.1 | 27.6  | 79.6   | 16.1     |
| Pusa 44*GR8              | WCH10     | 121.7   | 22.0 | 10.6 | 103.1 | 20.2  | 85.4   | 37.2     |
| Pusa 44*IRG-47           | WCH11     | 106.7   | 20.9 | 12.7 | 60.4  | 24.1  | 71.0   | 10.7     |
| Pusa 44*IRGC137          | WCH12     | 126.2   | 17.1 | 18.1 | 154.5 | 102.5 | 60.2   | 22.6     |
| Pusa 44*IRG-179          | WCH13     | 104.2   | 21.3 | 10.3 | 40.1  | 36.3  | 52.6   | 12.4     |
| Pusa 44*BJ-1(Purple awn) | WCH14     | 151.9   | 29.1 | 5.0  | 163.5 | 72.9  | 71.9   | 26.2     |
| Pusa 44*Kataktara        | WCH15     | 119.4   | 22.5 | 6.6  | 102.3 | 12.6  | 89.0   | 27.2     |
| Pusa 44*Dular            | WCH16     | 107.4   | 24.2 | 8.1  | 95.0  | 14.0  | 88.0   | 27.3     |
| Pusa 44*TPJ 245          | WCH17     | 101.6   | 19.7 | 9.6  | 106.0 | 18.1  | 86.5   | 30.7     |
| Pusa 44*IRG-144          | WCH18     | 111.3   | 18.9 | 9.3  | 81.6  | 39.7  | 70.4   | 11.7     |
| Pusa 44*IRGC11336        | WCH19     | 141.6   | 30.8 | 5.7  | 93.2  | 74.0  | 57.7   | 34.3     |
| Pusa 44*IRG-55           | WCH20     | 114.5   | 22.2 | 7.2  | 104.0 | 12.2  | 89.5   | 15.3     |
| Pusa 44*OYC 183          | WCH21     | 113.4   | 22.4 | 8.1  | 98.7  | 23.2  | 82.8   | 31.1     |
| Pusa 44*IRG-142          | WCH22     | 115.8   | 27.0 | 6.3  | 118.0 | 22.7  | 84.1   | 36.6     |
| Pusa 44*IRG-143          | WCH23     | 121.5   | 26.0 | 10.3 | 106.1 | 15.8  | 86.9   | 47.1     |
| Pusa 44*IRG-204          | WCH24     | 109.6   | 21.7 | 8.3  | 79.0  | 30.0  | 75.1   | 34.9     |
| Pusa 44*OYR 128          | WCH25     | 122.9   | 19.2 | 21.1 | 159.8 | 93.6  | 63.1   | 40.4     |
| Pusa 44*IRGC50399        | WCH26     | 118.5   | 24.0 | 9.9  | 72.2  | 31.6  | 69.7   | 22.1     |
| Pusa 44*PR 120           | WCH27     | 124.1   | 24.1 | 10.0 | 60.6  | 40.8  | 62.7   | 24.8     |
| Pusa 44*IRGC5441         | WCH28     | 124.3   | 22.9 | 8.7  | 63.7  | 32.2  | 66.8   | 19.1     |
| Pusa 44*IRG-137          | WCH29     | 138.9   | 21.7 | 22.2 | 130.2 | 32.9  | 80.8   | 29.5     |
| Pusa 44*IRG-164          | WCH30     | 119.3   | 21.8 | 5.9  | 46.6  | 43.5  | 54.4   | 12.2     |
| Pusa 44*DV 85            | WCH31     | 143.1   | 20.5 | 24.1 | 92.2  | 21.7  | 80.9   | 34.4     |
| Pusa 44*IRGC8182         | WCH32     | 99.0    | 19.8 | 5.3  | 58.7  | 44.6  | 61.6   | 10.1     |
| Pusa 44*IRG-169          | WCH33     | 91.7    | 23.6 | 17.4 | 136.3 | 44.4  | 78.4   | 11.8     |
| Pusa 44*IRGC71559        | WCH34     | 112.7   | 23.0 | 10.1 | 123.1 | 40.8  | 75.0   | 18.8     |
| Pusa 44*Peeli badam      | WCH35     | 123.8   | 22.5 | 8.6  | 123.2 | 19.0  | 87.3   | 32.0     |
| Pusa 44*Lalan Kanda      | WCH36     | 117.6   | 24.4 | 10.1 | 156.9 | 27.2  | 85.6   | 29.4     |
| Pusa 44*IRG-200          | WCH37     | 126.7   | 26.7 | 12.2 | 111.3 | 31.9  | 77.7   | 31.2     |
| Pusa 44*TPJ 247          | WCH38     | 117.2   | 19.7 | 8.1  | 73.3  | 20.0  | 78.4   | 11.9     |
| Pusa 44*IRGC5726         | WCH39     | 109.0   | 24.3 | 8.8  | 125.9 | 32.5  | 80.1   | 12.4     |
| Pusa 44*IRG-251          | WCH40     | 124.5   | 21.2 | 7.5  | 151.1 | 42.6  | 78.6   | 39.1     |
| Pusa 44*IRGC10658        | WCH41     | 127.2   | 26.5 | 7.1  | 192.2 | 42.1  | 83.7   | 37.2     |
| IR64*IRGC50399           | WCH42     | 120.3   | 21.0 | 8.7  | 66.0  | 36.7  | 64.5   | 19.1     |
| IR64*PR 120              | WCH43     | 113.4   | 21.6 | 9.0  | 105.7 | 26.1  | 81.3   | 9.8      |
| IR64*IRG-143             | WCH44     | 110.0   | 21.8 | 7.9  | 65.2  | 26.7  | 74.6   | 17.6     |
| IR64*IRGC8182            | WCH45     | 102.4   | 24.4 | 12.0 | 34.5  | 29.8  | 54.0   | 4.7      |
| IR64*Peeli badam         | WCH46     | 108.4   | 21.1 | 7.3  | 106.6 | 24.3  | 82.3   | 16.7     |
| IR64*Kataktara           | WCH47     | 109.8   | 27.0 | 6.2  | 93.7  | 11.5  | 89.4   | 18.4     |
| IR64*OYR 128             | WCH48     | 98.0    | 22.5 | 7.1  | 57.0  | 42.9  | 56.8   | 11.1     |
| IR64*Lalan Kanda         | WCH49     | 110.8   | 24.4 | 6.8  | 72.3  | 48.4  | 63.2   | 39.9     |

**Supplementary Table S5 (Contd...)**

| <b>Cross combination</b> | <b>Genotypes</b> | <b>PH (cm)</b> | <b>NT</b> | <b>PL</b> | <b>FG</b> | <b>UFG</b> | <b>SF (%)</b> | <b>YPP (gm)</b> |
|--------------------------|------------------|----------------|-----------|-----------|-----------|------------|---------------|-----------------|
| IR64*IRG-337             | WCH50            | 135.3          | 26.2      | 5.9       | 94.6      | 33.8       | 73.6          | 24.5            |
| IR64*TPJ 206             | WCH51            | 135.5          | 26.6      | 10.5      | 151.3     | 106.5      | 58.8          | 24.5            |
| IR64*IRG-204             | WCH52            | 110.6          | 19.0      | 10.9      | 86.6      | 36.6       | 73.3          | 31.6            |
| IR64*IRG-47              | WCH53            | 101.4          | 23.2      | 6.6       | 55.9      | 38.9       | 58.2          | 11.7            |
| IR64*TPJ 245             | WCH54            | 98.2           | 23.4      | 8.7       | 114.3     | 17.7       | 87.8          | 30.3            |
| IR64*RP 2421             | WCH55            | 99.9           | 20.8      | 7.0       | 125.4     | 26.8       | 82.9          | 35.0            |
| IR64*IRGC32406           | WCH56            | 119.9          | 23.8      | 5.7       | 95.3      | 13.7       | 87.3          | 17.6            |
| IR64*IRG-251             | WCH57            | 118.8          | 22.2      | 9.3       | 54.8      | 41.5       | 57.6          | 15.2            |
| IR64*IRG-251             | WCH58            | 107.8          | 25.4      | 10.2      | 122.2     | 20.0       | 86.6          | 40.5            |
| IR64*IRG-137             | WCH59            | 122.3          | 23.2      | 9.2       | 154.1     | 21.2       | 88.2          | 16.1            |
| IR64*IRGC5441            | WCH60            | 102.3          | 24.6      | 7.5       | 54.3      | 41.4       | 60.2          | 25.8            |
| IR64*IRG-144             | WCH61            | 113.1          | 21.7      | 7.5       | 81.6      | 41.7       | 69.5          | 12.8            |
| IR64*IRG-169             | WCH62            | 103.5          | 19.7      | 22.3      | 64.7      | 66.7       | 49.3          | 13.8            |
| IR64*Joymati             | WCH63            | 118.9          | 24.3      | 20.1      | 80.1      | 80.9       | 49.7          | 20.4            |
| IR64*IRGC6937            | WCH64            | 129.0          | 18.7      | 16.7      | 69.1      | 73.3       | 48.4          | 21.1            |
| IR64*GR8                 | WCH65            | 100.2          | 20.7      | 7.1       | 75.4      | 41.9       | 65.0          | 16.9            |
| IR64*TPJ 247             | WCH66            | 123.7          | 25.1      | 7.9       | 21.3      | 74.9       | 22.2          | 14.8            |
| IR64*Dular               | WCH67            | 106.7          | 22.2      | 7.2       | 55.0      | 50.4       | 52.4          | 13.8            |
| IR64*IRGC10658           | WCH68            | 117.1          | 24.1      | 6.8       | 94.0      | 19.2       | 83.0          | 15.6            |
| IR64*IRG-55              | WCH69            | 112.4          | 22.6      | 7.1       | 48.9      | 25.9       | 66.7          | 11.3            |
| IR64*IRG-164             | WCH70            | 105.4          | 23.2      | 6.9       | 54.8      | 29.7       | 64.8          | 10.5            |
| IR64*OYC 183             | WCH71            | 104.3          | 23.4      | 9.2       | 43.2      | 29.7       | 59.3          | 11.0            |
| IR64*DV 85               | WCH72            | 100.3          | 24.8      | 9.0       | 68.8      | 23.1       | 74.8          | 21.8            |
| IR64*IRGC137             | WCH73            | 97.6           | 24.0      | 8.1       | 69.1      | 14.3       | 83.4          | 17.5            |
| IR64*IRGC11336           | WCH74            | 126.1          | 26.9      | 7.1       | 55.6      | 49.6       | 52.8          | 11.3            |
| IR64*Kamlesh             | WCH75            | 118.6          | 22.7      | 11.7      | 96.2      | 34.6       | 73.6          | 10.1            |
| IR64*IRG-200             | WCH76            | 105.5          | 22.7      | 6.9       | 53.3      | 19.2       | 73.3          | 9.6             |
| IR64*IRG-141             | WCH77            | 106.6          | 22.2      | 8.2       | 67.0      | 6.1        | 91.5          | 11.7            |
| IR64*IRG-179             | WCH78            | 104.7          | 24.9      | 8.6       | 64.6      | 27.4       | 70.1          | 11.9            |
| IR64*IRG-142             | WCH79            | 122.6          | 25.4      | 8.8       | 75.5      | 16.3       | 82.2          | 11.6            |
| IR64*IRGC5726            | WCH80            | 107.8          | 26.9      | 5.3       | 155.8     | 34.8       | 82.3          | 14.1            |
| IR64*IRGC71559           | WCH81            | 116.7          | 20.3      | 8.9       | 117.7     | 37.3       | 76.0          | 17.7            |
| IR64*Nagina22            | WCH82            | 99.7           | 21.3      | 7.7       | 36.3      | 26.9       | 56.7          | 9.5             |
| IRGC8146 *OYC 183        | WCH83            | 113.1          | 24.9      | 9.9       | 165.7     | 54.3       | 75.7          | 28.0            |
| IRGC8146*OYR 128         | WCH84            | 118.3          | 24.4      | 8.4       | 146.4     | 34.7       | 81.6          | 48.7            |
| IRGC8146*IRGC50399       | WCH85            | 112.8          | 24.0      | 4.3       | 64.6      | 22.0       | 73.4          | 6.7             |
| IRGC8146*IRGC5441        | WCH86            | 118.7          | 24.8      | 6.8       | 142.7     | 26.3       | 85.4          | 27.4            |
| IRGC8146*IRG-251         | WCH87            | 141.0          | 28.2      | 5.6       | 76.9      | 49.9       | 60.7          | 20.5            |
| IRGC8146*PR 120          | WCH88            | 106.9          | 24.5      | 8.4       | 52.9      | 13.6       | 80.4          | 12.0            |
| IRGC8146*IRG-137         | WCH89            | 127.3          | 25.3      | 6.2       | 81.2      | 9.0        | 90.0          | 19.0            |
| IRGC8146*IRG-141         | WCH90            | 107.6          | 22.0      | 8.1       | 61.3      | 16.9       | 79.8          | 24.0            |
| IRGC8146*IRG-169         | WCH91            | 99.8           | 23.2      | 6.5       | 75.0      | 17.0       | 81.5          | 17.5            |

**Supplementary Table S5** (*Contd...*)

| <b>Cross combination</b> | <b>Genotypes</b> | <b>PH (cm)</b> | <b>NT</b> | <b>PL</b> | <b>FG</b> | <b>UFG</b> | <b>SF (%)</b> | <b>YPP (gm)</b> |
|--------------------------|------------------|----------------|-----------|-----------|-----------|------------|---------------|-----------------|
| IRGC8146*IRGC8182        | WCH92            | 103.6          | 21.0      | 7.4       | 110.8     | 35.0       | 76.4          | 15.6            |
| IRGC8146*DV 85           | WCH93            | 120.7          | 22.9      | 7.8       | 120.6     | 27.6       | 82.2          | 32.0            |
| IRGC8146*IRG-251         | WCH94            | 147.1          | 21.3      | 21.5      | 29.1      | 132.6      | 17.6          | 8.3             |
| IRGC8146*IRG-142         | WCH95            | 133.5          | 25.5      | 10.0      | 59.1      | 66.7       | 45.7          | 17.6            |
| IRGC8146*Dular           | WCH96            | 108.0          | 24.0      | 7.4       | 66.7      | 9.0        | 88.1          | 15.5            |
| IRGC8146*Lalan Kanda     | WCH97            | 118.0          | 22.8      | 8.9       | 176.1     | 56.2       | 76.0          | 25.3            |
| IRGC8146*IRG-204         | WCH98            | 109.5          | 21.9      | 12.2      | 115.4     | 50.8       | 69.6          | 26.4            |
| IRGC8146*Nagina22        | WCH99            | 115.0          | 20.8      | 6.7       | 53.1      | 34.1       | 61.3          | 23.8            |
| IRGC8146*Kataktara       | WCH100           | 127.2          | 24.0      | 8.3       | 78.5      | 16.2       | 82.1          | 23.5            |
| IRGC8146*IRG-179         | WCH101           | 119.1          | 19.6      | 9.7       | 61.5      | 21.7       | 74.4          | 28.0            |
| IRGC8146*IRG-143         | WCH102           | 124.2          | 27.1      | 8.7       | 100.5     | 105.0      | 48.9          | 20.5            |
| IRGC8146*IRGC71559       | WCH103           | 118.3          | 21.7      | 8.3       | 96.1      | 22.7       | 81.4          | 22.0            |
| IRGC8146*IRG-55          | WCH104           | 124.8          | 25.0      | 8.8       | 86.4      | 22.0       | 81.0          | 18.2            |
| IRGC8146*IRGC5726        | WCH105           | 112.2          | 22.6      | 8.0       | 63.1      | 83.1       | 43.0          | 15.5            |
| IRGC8146*IRGC32406       | WCH106           | 103.4          | 18.8      | 9.3       | 121.8     | 67.6       | 64.5          | 25.0            |
| IRGC8146*IRG-164         | WCH107           | 128.6          | 20.0      | 12.8      | 85.5      | 19.5       | 81.5          | 19.2            |
| IRGC8146*Joymati         | WCH108           | 107.5          | 24.6      | 12.2      | 98.4      | 27.4       | 78.5          | 35.2            |
| IRGC8146*IRG-337         | WCH109           | 134.0          | 26.9      | 6.1       | 108.6     | 89.6       | 54.8          | 14.0            |
| IRGC8146*IRG-144         | WCH110           | 108.6          | 18.6      | 8.5       | 82.2      | 38.3       | 68.4          | 17.2            |
| IRGC8146*RP 2421         | WCH111           | 107.1          | 22.6      | 7.5       | 83.8      | 71.7       | 54.5          | 31.7            |
| IRGC8146*Kamlesh         | WCH112           | 99.8           | 26.2      | 7.4       | 64.8      | 31.0       | 70.0          | 29.5            |
| IRGC8146*TPJ 206         | WCH113           | 148.0          | 27.6      | 5.2       | 98.9      | 87.9       | 53.0          | 11.3            |
| IRGC8146*IRGC10658       | WCH114           | 123.1          | 26.0      | 7.7       | 59.4      | 51.1       | 59.2          | 13.3            |
| IRGC8146*Peeli badam     | WCH115           | 130.2          | 21.6      | 7.2       | 90.2      | 42.4       | 69.7          | 27.7            |
| IRGC8146*GR8             | WCH116           | 112.7          | 24.1      | 6.6       | 67.6      | 45.8       | 59.7          | 25.0            |
| IRGC8146*IRG-47          | WCH117           | 136.3          | 24.4      | 6.6       | 136.0     | 17.6       | 88.6          | 12.9            |
| IRGC8146*TPJ 247         | WCH118           | 123.8          | 24.2      | 4.2       | 85.3      | 20.7       | 80.5          | 8.2             |
| IRGC8146*TPJ 245         | WCH119           | 117.8          | 24.6      | 8.3       | 130.0     | 34.7       | 79.5          | 27.7            |
| IRGC8146*IRGC137         | WCH120           | 129.6          | 20.2      | 12.9      | 188.3     | 41.2       | 82.2          | 32.4            |
| IRGC8146*IRGC11336       | WCH121           | 141.2          | 20.2      | 13.9      | 158.9     | 63.4       | 71.6          | 38.3            |
| IRGC8146*IRG-200         | WCH122           | 114.9          | 21.2      | 21.3      | 129.0     | 26.3       | 83.4          | 24.3            |
| IRGC8146*IRGC6937        | WCH123           | 134.3          | 28.9      | 6.0       | 106.7     | 66.5       | 61.6          | 14.4            |
| IRGC15046*OYR 128        | WCH124           | 127.3          | 18.8      | 12.8      | 129.2     | 31.8       | 80.3          | 19.9            |
| IRGC15046*IRGC10658      | WCH125           | 122.3          | 21.7      | 4.6       | 98.2      | 20.1       | 84.4          | 46.6            |
| IRGC15046*IRGC5441       | WCH126           | 121.8          | 23.2      | 7.6       | 74.6      | 14.4       | 84.8          | 14.7            |
| IRGC15046*IRG-251        | WCH127           | 132.9          | 25.7      | 8.4       | 62.3      | 15.3       | 80.8          | 15.3            |
| IRGC15046*PR 120         | WCH128           | 113.5          | 20.0      | 19.6      | 65.1      | 11.1       | 85.2          | 13.6            |
| IRGC15046*IRG-137        | WCH129           | 140.1          | 24.6      | 7.4       | 88.1      | 27.1       | 78.7          | 53.5            |
| IRGC15046*IRG-141        | WCH130           | 118.9          | 24.2      | 12.4      | 85.4      | 24.7       | 79.2          | 22.0            |
| IRGC15046*IRG-169        | WCH131           | 101.5          | 24.8      | 9.4       | 68.0      | 24.4       | 73.4          | 25.4            |
| IRGC15046*IRGC8182       | WCH132           | 111.1          | 23.3      | 9.2       | 62.5      | 29.6       | 68.2          | 8.6             |
| IRGC15046*DV 85          | WCH133           | 120.6          | 27.1      | 9.9       | 56.6      | 42.2       | 57.5          | 32.5            |

**Supplementary Table S5** (*Contd...*)

| <b>Cross combination</b> | <b>Genotypes</b> | <b>PH (cm)</b> | <b>NT</b> | <b>PL</b> | <b>FG</b> | <b>UFG</b> | <b>SF (%)</b> | <b>YPP (gm)</b> |
|--------------------------|------------------|----------------|-----------|-----------|-----------|------------|---------------|-----------------|
| IRGC15046*IRG-251        | WCH134           | 129.7          | 29.7      | 9.3       | 51.0      | 152.5      | 25.1          | 9.9             |
| IRGC15046*IRG-337        | WCH135           | 129.2          | 20.9      | 6.1       | 113.6     | 80.3       | 58.6          | 17.3            |
| IRGC15046*Kamlesh        | WCH136           | 137.2          | 22.9      | 8.5       | 77.5      | 26.6       | 75.6          | 31.0            |
| IRGC15046*Lalan Knda     | WCH137           | 146.1          | 19.6      | 19.2      | 160.9     | 49.9       | 76.7          | 26.5            |
| IRGC15046*IRG-204        | WCH138           | 115.1          | 28.1      | 25.2      | 85.7      | 31.3       | 73.2          | 32.7            |
| IRGC15046*Nagina22       | WCH139           | 105.3          | 19.8      | 9.6       | 136.5     | 40.7       | 77.3          | 24.7            |
| IRGC15046*Kataktara      | WCH140           | 117.1          | 25.2      | 7.0       | 82.0      | 30.3       | 73.1          | 29.0            |
| IRGC15046*IRG-179        | WCH141           | 94.7           | 19.3      | 8.1       | 62.1      | 28.6       | 72.2          | 22.6            |
| IRGC15046*IRG-47         | WCH142           | 125.6          | 19.3      | 8.5       | 124.0     | 18.3       | 87.0          | 13.6            |
| IRGC15046*IRG-200        | WCH143           | 120.2          | 19.8      | 20.5      | 137.0     | 18.0       | 88.4          | 28.3            |
| IRGC15046*IRGC71559      | WCH144           | 113.2          | 23.2      | 6.7       | 106.2     | 36.8       | 77.4          | 11.1            |
| IRGC15046*Dular          | WCH145           | 123.2          | 23.6      | 9.2       | 77.5      | 12.6       | 86.0          | 13.9            |
| IRGC15046*IRG-142        | WCH146           | 119.2          | 20.1      | 11.8      | 69.3      | 52.9       | 56.3          | 12.1            |
| IRGC15046*IRGC5726       | WCH147           | 125.2          | 20.9      | 16.5      | 91.7      | 28.0       | 76.7          | 18.4            |
| IRGC15046*IRG-164        | WCH148           | 124.5          | 18.3      | 12.0      | 83.6      | 17.9       | 82.6          | 19.9            |
| IRGC15046*WCV86          | WCH149           | 124.8          | 19.1      | 24.7      | 97.0      | 37.8       | 72.0          | 29.8            |
| IRGC15046*Pili badam     | WCH150           | 127.6          | 20.5      | 10.7      | 87.9      | 39.2       | 70.2          | 18.4            |
| IRGC15046*Joymati        | WCH151           | 135.4          | 22.8      | 8.1       | 182.0     | 71.7       | 71.8          | 10.5            |
| IRGC15046*IRG-144        | WCH152           | 120.6          | 21.5      | 18.2      | 177.8     | 39.0       | 82.1          | 25.1            |
| IRGC15046*RP 2421        | WCH153           | 124.9          | 20.5      | 18.0      | 101.2     | 58.8       | 63.3          | 19.1            |
| IRGC15046*TPJ 206        | WCH154           | 112.0          | 25.0      | 8.4       | 62.5      | 28.7       | 68.5          | 13.4            |
| IRGC15046*IRGC137        | WCH155           | 136.2          | 20.5      | 15.6      | 189.8     | 31.3       | 85.8          | 35.2            |
| IRGC15046*IRG-55         | WCH156           | 116.2          | 22.2      | 11.5      | 80.3      | 18.9       | 80.9          | 14.0            |
| IRGC15046*GR8            | WCH157           | 109.6          | 21.9      | 6.7       | 77.8      | 30.5       | 76.2          | 31.1            |
| IRGC15046*TPJ 247        | WCH158           | 129.4          | 23.5      | 5.3       | 62.3      | 20.7       | 75.3          | 15.9            |
| IRGC15046*TPJ 245        | WCH159           | 97.9           | 19.9      | 7.1       | 140.2     | 35.6       | 79.8          | 12.1            |
| IRGC15046*IRGC11336      | WCH160           | 147.1          | 19.0      | 14.6      | 177.7     | 78.8       | 69.3          | 41.3            |
| IRGC15046*IRG-143        | WCH161           | 123.2          | 23.2      | 10.5      | 107.9     | 95.3       | 53.1          | 21.7            |
| IRGC15046*IRGC50399      | WCH162           | 114.7          | 20.3      | 7.9       | 79.7      | 17.0       | 82.4          | 11.3            |
| IRGC15046*IRGC6937       | WCH163           | 123.8          | 24.7      | 4.0       | 109.8     | 63.0       | 63.6          | 17.1            |
| IRGC15046*OYC 183        | WCH164           | 116.0          | 20.6      | 10.6      | 155.0     | 48.7       | 76.4          | 27.1            |
| Pusa 44                  | Check1           | 124.0          | 21.5      | 20.2      | 137.3     | 56.3       | 70.9          | 30.3            |
| IR64                     | Check2           | 120.3          | 20.5      | 20.5      | 99.0      | 61.0       | 61.9          | 31.6            |
| IRGC8146                 | Check3           | 105.3          | 23.9      | 19.3      | 128.3     | 35.1       | 78.5          | 31.1            |
| IRGC15046                | Check4           | 103.3          | 23.2      | 20.8      | 110.3     | 18.3       | 85.8          | 28.3            |
|                          | <b>Minimum</b>   | 91.7           | 17.1      | 4.0       | 21.3      | 6.1        | 17.6          | 4.7             |
|                          | <b>Maximum</b>   | 151.9          | 30.8      | 25.2      | 192.2     | 152.5      | 91.5          | 53.5            |
|                          | <b>Mean</b>      | 118.1          | 23.0      | 10.0      | 96.9      | 39.3       | 72.1          | 22.0            |
